# Supplementary material for: SIRT2 suppressed osteogenesis via transcriptionally regulation of SLC31A1-meidated cuproptosis in a crotonylation manner
Source: Research Square preprint supplement (doi:10.21203/rs.3.rs-7734583/v1), 2025-09-30
Supplement: Supplementary file 1 [file 300978059c33b6aee93b9910.docx]

**Supplementary Table Ⅱ List of abbreviations used in this study**

| **Abbreviation** | **Full name** |
| --- | --- |
| AAV | Adeno-associated virus |
| ALP | Alkaline phosphatase |
| ARS | Alizarin Red S |
| BGP | Bone Gla protein (osteocalcin) |
| BMD | Bone mineral density |
| BV/TV | Bone volume fraction |
| ChIP-qPCR | Chromatin immunoprecipitation followed by quantitative PCR |
| Co-IP | Co-immunoprecipitation |
| CTR1 | Copper transporter 1 |
| CuET | Elesclomol (copper-dependent cell death inducer) |
| CTX-1 | C-terminal telopeptide of type I collagen |
| DLAT | Dihydrolipoamide S-acetyltransferase |
| DXA | Dual-energy X-ray absorptiometry |
| ELF3 | E74-like factor 3 (transcription factor) |
| Fe–S | Iron–sulfur cluster |
| FDX1 | Ferredoxin 1 |
| GEO | Gene Expression Omnibus |
| hBMSCs | Human bone marrow-derived mesenchymal stem cells |
| H3K4cr | Histone H3 lysine 4 crotonylation |
| IHC | Immunohistochemistry |
| Kcr | Histone crotonylation |
| LIPT1 | Lipoyltransferase 1 |
| Micro-CT | Micro-computed tomography |
| Na-Cro | Sodium crotonate |
| NAD⁺ | Nicotinamide adenine dinucleotide |
| oeSIRT2 | SIRT2 overexpression |
| OP | Osteoporosis |
| OVX | Ovariectomized rat model |
| pcDNA | Empty pcDNA control vector |
| qPCR | Quantitative polymerase chain reaction |
| RT-qPCR | Reverse transcription quantitative polymerase chain reaction |
| Runx2 | Runt-related transcription factor 2 |
| shNC | Short hairpin RNA negative control |
| shSIRT2 | Short hairpin RNA targeting SIRT2 |
| SLC31A1 | Solute carrier family 31 member 1 (Copper transporter 1) |
| SIRT2 | Sirtuin 2 |
| Tb. N | Trabecular number |
